# Supplementary material for: Cochlear Implantation Outcome in Children with DFNB1 locus Pathogenic Variants
Source: MDPI journal article supplement (doi:10.3390/jcm9010228), 2020-01-15
Supplement: s1 [file s1]

**Table S1.** Demographic characteristics of CI patients

|                                  | nonDFNB1 patients                                                                                 | DFNB1 patients                                                                                     |
|----------------------------------|---------------------------------------------------------------------------------------------------|----------------------------------------------------------------------------------------------------|
| Sex<br>[M:F]                     | 1.35 : 1<br>(M - 27, F - 20)                                                                      | 1.16 : 1<br>(M - 80, F - 69)                                                                       |
| Age at CI<br>[months]            | 12.04 ± 0.44<br>(M - 12.52 ± 0.63;<br>F - 11.40 ± 0.63)                                           | 12.14 ± 0.23<br>(M - 12.14 ± 0.32;<br>F - 12.14 ± 0.33)                                            |
| CI<br>[very early, early]        | very early - 28, early - 19<br>(M: very early - 15, early - 12;<br>F: very early - 13, early - 7) | very early - 83, early - 66<br>(M: very early - 43, early - 37;<br>F: very early - 40, early - 29) |
| HAs responses<br>[minimal, wide] | minimal - 24, wide - 23<br>(M: minimal - 14, wide - 13;<br>F: minimal - 10; wide - 10)            | minimal - 76, wide - 73<br>(M: minimal - 41, wide - 39;<br>F: minimal - 35; wide - 34)             |

M—males; F—females; CI—cochlear implantation; HAs—hearing aids, minimal HAs—no free-field responses or responses only up to 500 Hz in HAs; wide HAs—free-field responses for at least 250, 500 and 1000 Hz in HAs

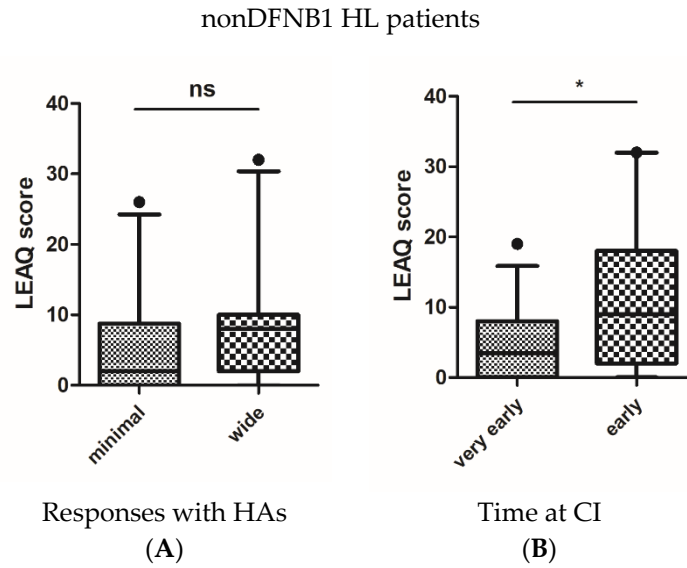

**Figure S1.** LEAQ scores at the time of cochlear implant activation in nonDFNB1 patients. (A) Differences in LEAQ scores in patients with minimal and wide responses provided by HAs; (B) Differences in LEAQ scores in patients with very early and early CI. Whiskers represent 5–95 percentile and black dots indicate outliers. Asterisks represent statistical significance,  $*p < 0.05$ ; ns, not significant.

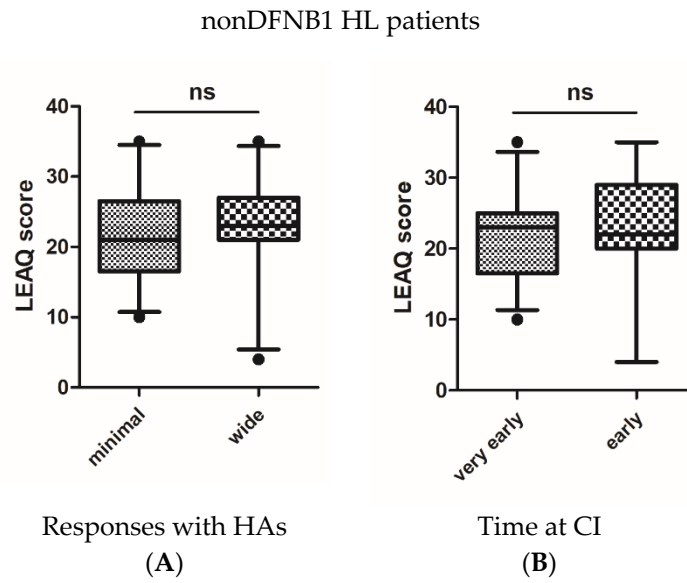

**Figure S2.** LEAQ scores at 5th month after cochlear implantation in nonDFNB1 patients. (A) Differences in LEAQ scores in patients with minimal and wide responses provided by HAs; (B) Differences in LEAQ scores in patients with very early and early CI. Whiskers represent 5–95 percentile and black dots indicate outliers; ns, not significant.
